# Supplementary material for: Study of the surface properties of ZnO nanocolumns used for thin-film solar cells
Source: publisher site journal article supplement (doi:10.3762/bjnano.8.48), 2017-02-16
Supplement: Additional file 1 [file 2190-4286-8-48-S1.pdf]

## **Supporting Information**

for

### **Study of the surface properties of ZnO nanocolumns used for thin-film solar cells**

Neda Neykova\*<sup>1</sup>, Jiri Stuchlik<sup>1</sup>, Karel Hruska<sup>1</sup>, Ales Poruba<sup>1</sup>, Zdenek Remes<sup>1</sup> and  
Ognen Pop-Georgievski<sup>2</sup>

Address: <sup>1</sup>Institute of Physics AS CR v.v.i., Cukrovarnicka 10, 162 53 Prague, Czech Republic and <sup>2</sup>Institute of Macromolecular Chemistry AS CR v.v.i., Heyrovsky sq. 2, 162 06 Prague, Czech Republic

Email: Neda Neykova\* - neykova@fzu.cz

\* Corresponding author

### **Additional SEM pictures**

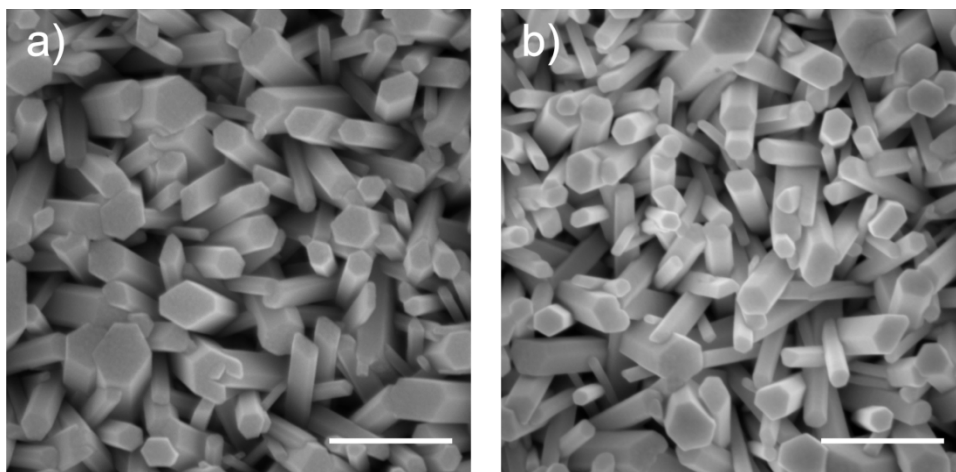

**Figure S1:** SEM micrographs of ZnO nanocolumns before (a) and after treatment in hydrogen plasma for 25 min (scale bar of 500 nm).

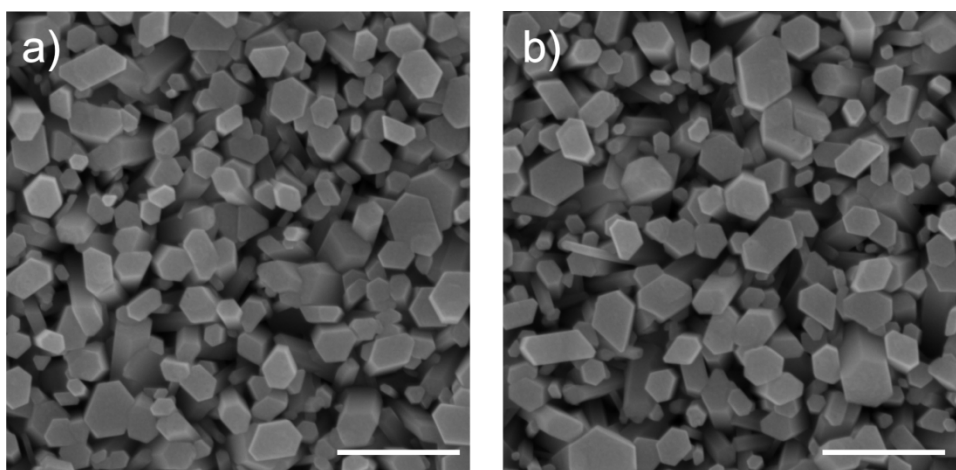

**Figure S2:** SEM micrographs of ZnO nanocolumns before (a) and after treatment in oxygen plasma for 25 min (scale bar of 500 nm).
